# Supplementary material for: Combinatorial development of antibacterial Zr-Cu-Al-Ag thin film metallic glasses
Source: PubMed Central journal article supplement (PMC4882501; doi:10.1038/srep26950), 2016-05-27
Supplement: srep26950-s1.pdf [file srep26950-s1.pdf]

## Supplementary Information

### Combinatorial development of antibacterial Zr-Cu-Al-Ag thin film metallic glasses

Yanhui Liu <sup>1,2,\*</sup>, Jagannath Padmanabhan <sup>1,3,\*</sup>, Bettina Cheung <sup>3</sup>, Jingbei Liu <sup>1,2</sup>, Zheng Chen <sup>1,2</sup>,  
B. Ellen Scanley <sup>4</sup>, Donna Wesolowski <sup>5</sup>, Mariyah Pressley <sup>1</sup>, Christine C. Broadbridge<sup>1,4</sup>,  
Sidney Altman <sup>5</sup>, Udo D. Schwarz <sup>1,2,6</sup>, Themis R. Kyriakides <sup>1,3,7,#</sup>, Jan Schroers <sup>1,2,#</sup>

<sup>1</sup> *Center for Research on Interface Structures and Phenomena, Yale University, New Haven CT 06511, USA*

<sup>2</sup> *Department of Mechanical Engineering and Materials Science, Yale University, New Haven CT 06511, USA*

<sup>3</sup> *Department of Biomedical Engineering, Yale University, New Haven CT 06511, USA*

<sup>4</sup> *Department of Physics, Southern Connecticut State University, New Haven, Connecticut 06515, USA*

<sup>5</sup> *Department of Molecular, Cellular and Developmental Biology, Yale University, New Haven CT 06520, USA*

<sup>6</sup> *Department of Chemical and Environmental Engineering, Yale University, New Haven CT 06520, USA*

<sup>7</sup> *Department of Pathology, Yale University, New Haven CT 06520, USA*

\* Those authors contributed equally to this work

# Corresponding author: Themis R. Kyriakides ([themis.kyriakides@yale.edu](mailto:themis.kyriakides@yale.edu))

Jan Schroers ([jan.schroers@yale.edu](mailto:jan.schroers@yale.edu))

## Supplementary Information

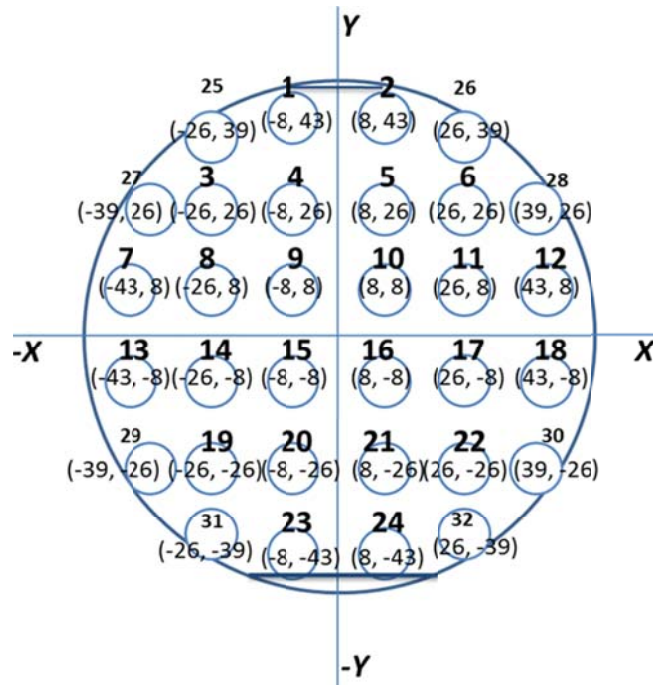

**Figure S1** Diagram showing the labels and center coordinates of the patch films on Si substrate. (0, 0) is center of the Si substrate.

## Supplementary Information

**Table S1** Compositions of the alloys in the material library measured at the center of patches.

| Patch# | Zr (%) | Cu (%) | Al (%) | Ag (%) |
|--------|--------|--------|--------|--------|
| 1      | 46.1   | 34.1   | 7.8    | 12.0   |
| 2      | 37.6   | 35.8   | 8.9    | 17.7   |
| 3      | 52.5   | 32.2   | 8.2    | 7.1    |
| 4      | 44.6   | 34.9   | 9.5    | 11.0   |
| 5      | 36.4   | 37.0   | 10.7   | 15.9   |
| 6      | 29.2   | 38.0   | 11.6   | 21.2   |
| 7      | 53.5   | 29.8   | 12.2   | 4.5    |
| 8      | 49.1   | 33.2   | 11.2   | 6.6    |
| 9      | 41.0   | 36.3   | 12.8   | 9.9    |
| 10     | 35.0   | 37.3   | 14.1   | 13.7   |
| 11     | 28.2   | 38.5   | 15.5   | 17.9   |
| 12     | 23.2   | 37.7   | 16.1   | 23.0   |
| 13     | 52.5   | 30.4   | 12.9   | 4.3    |
| 14     | 44.4   | 34.1   | 15.4   | 6.0    |
| 15     | 38.3   | 35.6   | 17.9   | 8.2    |
| 16     | 31.5   | 37.1   | 20.0   | 11.5   |
| 17     | 26.7   | 37.5   | 21.2   | 14.6   |
| 18     | 22.3   | 37.7   | 21.1   | 18.8   |
| 19     | 39.6   | 32.9   | 22.1   | 5.4    |
| 20     | 33.8   | 34.9   | 24.5   | 6.9    |
| 21     | 28.0   | 35.6   | 27.2   | 9.2    |
| 22     | 23.4   | 36.1   | 29.0   | 11.5   |
| 23     | 27.6   | 31.6   | 35.0   | 5.8    |
| 24     | 22.4   | 32.2   | 38.7   | 6.7    |

## Supplementary Information

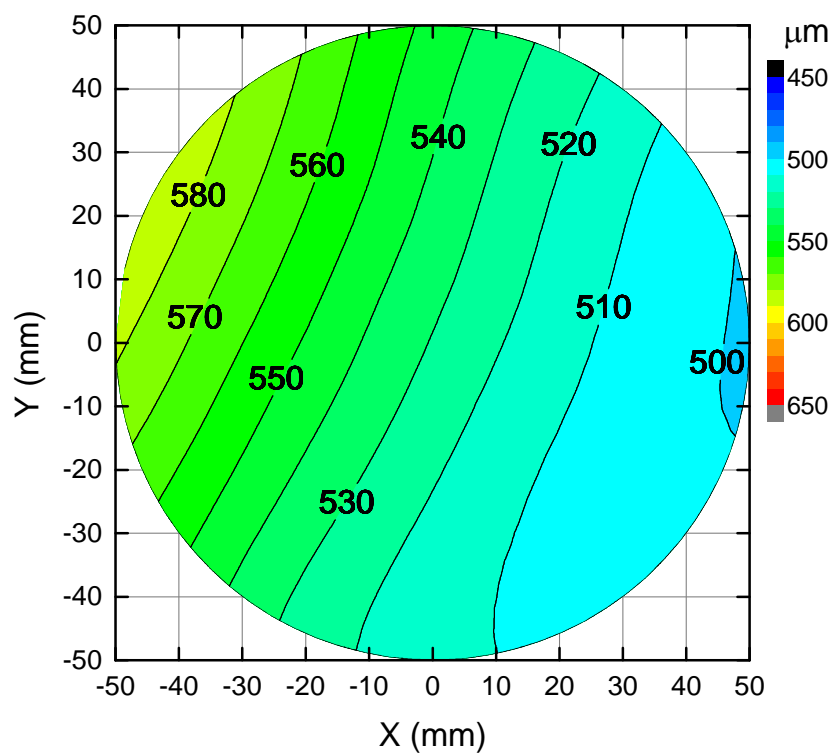

**Figure S2** Variation in film thickness across the library.

## Supplementary Information

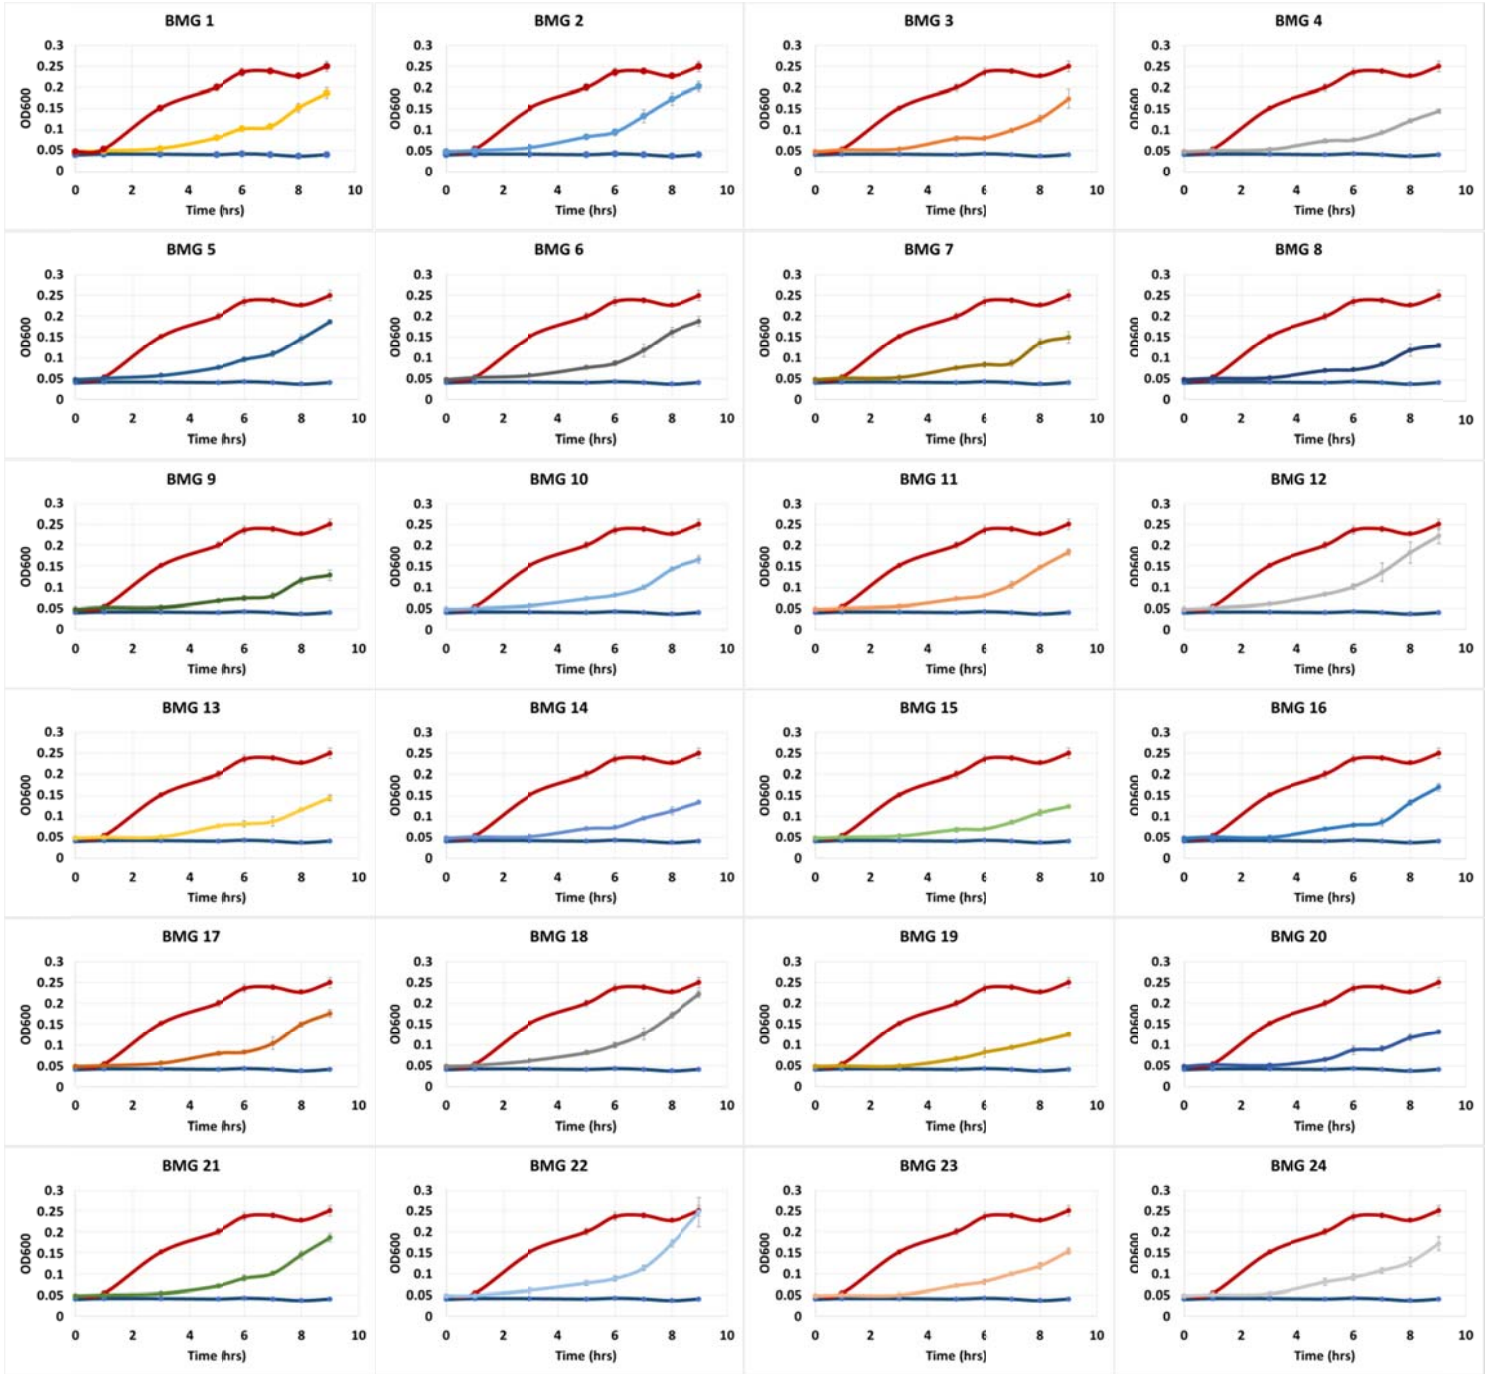

**Figure S3** O.D. as function of time for all the 24 alloys in our material library. The numbers correspond to patch labels indicated in Fig. S1.

## Supplementary Information
